# Relative value perception in an insect: positive and negative incentive contrasts in ants

Stephanie Wendt<sup>1,5</sup>, Kim S. Strunk<sup>2</sup>, Juergen Heinze<sup>3</sup>, Andreas Roeder<sup>4</sup> and Tomer J. Czaczkes<sup>1</sup>

1) Animal Comparative Economics laboratory, Institute of Zoology & Evolutionary Biology, University of Regensburg, 93053 Regensburg, Germany

2) School of Business, Economics and Information Systems, Chair of Management, People and Information, University of Passau, 94032 Passau

3) Institute of Zoology & Evolutionary Biology, University of Regensburg, 93053 Regensburg, Germany

4) Department of Economics, University of Regensburg, 93053 Regensburg, Germany

5) Corresponding author, email: wendtstephanie@outlook.de

## Abstract

Humans tend to value things not on their absolute values, but relative to reference points such as former experience or expectations. People rate the quality of a new salary relative to their previous salary and the salaries of their peers, instead of appreciating its absolute value. Here, we demonstrate a similar effect in an insect: ants, which had previously experienced a low quality food source, showed higher acceptance of medium quality food (e.g. 0.1M then 0.5M; positive contrast) than if they had received the medium food all along (e.g. 0.5M then 0.5M; control), and vice versa for high expectations. Further experiments demonstrate that these contrast effects arise from cognitive rather than mere sensory or pre-cognitive perceptual causes. Pheromone deposition also correlates with perceived reward value, and ants showed successive contrasts in their pheromone deposition. Relative value perception can therefore be expected to have strong effects not only on individual behaviour, but also on collective decision-making. Contrast effects were also social: the quality of food received from other ants affected the perceived value of food found later. Value judgement is a key element in decision making, and thus relative value perception will strongly influence how animals interact with their environment.

## Key Words

Incentive contrasts; successive contrasts; relative value perception; foraging; recruitment; private information

## 33 Introduction

34 We all compare options when making both large and small decisions, ranging from career choice to  
35 the choice of an evening's entertainment. Understanding how options are compared has thus been  
36 central to the study of behaviour and economics. Theories explaining the mechanisms by which  
37 options are compared and decisions are made have a long tradition (Vlaev et al. 2011), with Expected  
38 Utility Theory (EUT) being the most widely used theory in economic models (Mankiw 2011; von  
39 Neumann and Morgenstern 1944). EUT suggests that decisions are made by evaluating and comparing  
40 the expected pay-off from each option. A rational decision maker then chooses the option resulting in  
41 the best end state (i.e. the option providing the greatest utility) (von Neumann and Morgenstern 1944).

42 However, over the past decades economic research on how humans make decisions has started to  
43 shift away from a view of (absolute) utility maximization towards more nuanced notions of relative  
44 utility, such as reference-dependent evaluations. Kahneman and Tversky (1979) made a major  
45 contribution to this shift by introducing Prospect Theory, suggesting that decision making is not based  
46 on absolute outcomes, but rather on relative perceptions of gain and losses. In contrast to EUT, the  
47 utility attributed to options being evaluated is determined relative to a reference point, such as the  
48 status quo or former experience (Kahneman and Tversky 1979; Parducci 1984; Tversky and Kahneman  
49 1992; Ungemach, Stewart, and Reimers 2011; Vlaev et al. 2011). Various examples of relative value  
50 perception have been described. For example, satisfaction gained from income is perceived not  
51 absolutely, but relative to the income of others in the social reference group – such as one's colleagues  
52 (Boyce, Brown, and Moore 2010). Overall, Prospect Theory has enriched our understanding of human  
53 decision making by conceptualizing it as more nuanced than previously assumed (Tversky and  
54 Kahneman 1974, 1981).

55 A similar relativistic pattern can be found in sensory judgements: Humans rated drinks containing the  
56 same sucrose concentration sweeter when they were presented with a range of lower concentrations  
57 and less sweet when higher concentrations were presented more frequently (McBride 1982; Riskey,  
58 Parducci, and Beauchamp 1979). However, these findings also match well with predictions from  
59 psychophysics, in which the link between a given stimulus strength and its sensation is studied  
60 (Zwislocki 2009). A key psychophysical finding is that identical stimuli are perceived as more or less  
61 intense depending on the strength of reference stimuli.

62 The concept of malleable value perception is not just relevant to humans. Value judgments in animals  
63 are also influenced by factors apparently independent of the absolute value of options. For example,  
64 capuchin monkeys refuse otherwise acceptable pay (cucumber) in exchanges with a human  
65 experimenter if they had witnessed a conspecific obtain a more attractive reward (grape) for equal

66 effort (Brosnan and de Waal 2003). Rats, starlings, and ants, like humans, place greater value on things  
67 they work harder for (Aw, Vasconcelos, and Kacelnik 2011; Czaczkes, Brandstetter, et al. 2018; Lydall,  
68 Gilmour, and Dwyer 2010), and fish and locusts demonstrate state-dependent learning, wherein they  
69 show a preference for options experienced when they were in a poor condition (Aw et al. 2009;  
70 Pompilio, Kacelnik, and Behmer 2006). Roces and Núñez aimed to show that in leaf cutting ants  
71 perceived value can be influenced by other ants. Ants recruited to higher quality food sources ran  
72 faster, deposited more pheromone, but cut smaller leaf fragments, even if the food source the recruits  
73 find is replaced by a standardised food source (Roces 1993; Roces and Núñez 1993). However, in these  
74 experiments the absolute value and nature of the reference remains unclear, and indeed pheromone  
75 presence may have caused the observed behaviours without influencing the ants' expectations or  
76 value perception at all. Critically missing from this body of work is a systematic description of value  
77 judgment relative to a reference point.

78 A common way in which value is judged is by either comparing two options to each other or by  
79 comparing one option to an option experienced in the past. Thus, the perceived value of an option is  
80 likely to depend strongly on the strength of contrast between both options and on whether the new  
81 option results in a relative gain or a loss. Such value-distortion by comparison effects have been studied  
82 for decades using the successive contrasts paradigm. In such experiments, animals are trained to a  
83 quality or quantity of reward which is then suddenly increased (positive incentive contrast) or  
84 decreased (negative incentive contrast) (Bentosela et al. 2009; Bitterman 1976; Couvillon and  
85 Bitterman 1984; Crespi 1942; Flaherty 1982, 1999; Mustaca, Bentosela, and Papini 2000; Weinstein  
86 1970b). The reaction of animals towards the post-shift reward is then compared to the reaction of  
87 animals which always received the first reward and therefore did not experience a shift. Many  
88 mammals, including apes, monkeys, rats and dogs (Bentosela et al. 2009; Brosnan and de Waal 2003;  
89 Crespi 1942; Flaherty 1999; Mustaca, Bentosela, and Papini 2000; Pellegrini and Mustaca 2000;  
90 Weinstein 1970a) have been shown to respond to successive negative contrast by disrupting their  
91 behaviour compared to control animals which had not experienced a change in reward. The animals  
92 display behaviour akin to disappointment – slower running speeds to a reward (Bower 1961),  
93 depressed licking behaviour (Flaherty, Becker, and Pohorecky 1985; Vogel, Mikulka, and Spear 1968),  
94 or reward rejection (Tinklepaugh 1928).

95 However, unlike negative contrast effects, responses to positive successive contrast have rarely been  
96 found, even when searched for (Black 1968; Capaldi and Lynch 1967; Bower 1961; Dunham 1968;  
97 Papini et al. 2001). This may be due to three possible factors, which have the opposite effect of positive  
98 contrast and may counterbalance it: ceiling effects, neophobia, and generalization decrement  
99 (Annicchiarico et al. 2016; Flaherty 1999). Ceiling effects may occur when the performance of animals

100 receiving a large reward is at or near a physical limit. The absence of positive contrast may then not be  
101 generated by behavioural principles, but through an artefact of experimental design (Bower 1961;  
102 Campbell et al. 1970). Neophobia may manifest itself through the reluctance to eat novel food – even  
103 if the food is of higher quality than normal (Flaherty 1999). Generalization decrement may occur when  
104 animals are trained under one set of stimuli and then tested under another. The strength of the tested  
105 response may decrease with increasing differences between the training and testing stimuli (Kimble  
106 1961), which may then result in weaker positive contrast effects following a reward shift. Thus, the  
107 reward change itself may lead to a decrease in responding just as would any other change in context,  
108 such as a change in the brightness of the runway (Capaldi 1978; Premack and Hillix 1962).

109 Even though positive contrast effects proved to be hard to demonstrate in laboratory experiments,  
110 there are good theoretical reasons for expecting both positive and negative contrast effects to evolve  
111 (McNamara, Fawcett, and Houston 2013): if conditions become rich in the environment of an animal  
112 which was initially exposed to poor conditions, it should work harder than if conditions have been rich  
113 all along. This is because conditions are likely to worsen in the future and the animal should therefore  
114 use good conditions to the fullest while available. By contrast, if the animal was accustomed to rich  
115 conditions which then suddenly worsen, it should work less hard than if conditions have always been  
116 poor. In this case, rich conditions are likely to return and the animal would do better by waiting for the  
117 good conditions to return before continuing to exploit the environment. Lastly, contrast effects should  
118 be strongest in animals adapted to rapidly changing conditions, because it enhances the differential  
119 allocation of effort between favourable and unfavourable periods (McNamara, Fawcett, and Houston  
120 2013).

121 Contrast effects could potentially arise without differential valuation of options; other mechanisms  
122 could also in principle produce these results: contrast effects in sensory tasks could derive from simple  
123 psychophysical mechanisms (Fechner 1860; Zwislocki 2009), and thus arise from sensory perceptual  
124 mechanisms rather than higher level cognitive processing of value. Sensory judgements are also  
125 usually made relative to reference points and through constant comparisons with former stimuli  
126 (Helson 1964; Vlaev et al. 2011). The position of the reference point in the range of stimuli may thus  
127 bias how the stimulus, and thus the value, of a post-shift reward is perceived (Zwislocki 2009). For  
128 example, the sweetness of a sucrose solution may be perceived much stronger when the reference  
129 point to which it is compared is low. Sensory satiation may also result in apparent contrast effects: the  
130 more sweetness receptors are blocked by a sweet reference solution, the fewer receptors will fire  
131 when confronted with a post-shift reward, thus making solutions taste less sweet (Bitterman 1976). A  
132 final potential driver of apparent contrast effects is related to the theoretical benefits of such  
133 behaviour described above: animals may rationally expect the pre-shift reward to be available in the

134 future again and therefore rationally show lower acceptance towards the post-shift reward, because  
135 they are waiting for the pre-shift reward to reoccur.

136 The finding of contrast effects in the honey bee, until now the only invertebrate for which such  
137 behaviour was conclusively shown, led to a fourth explanation for contrast effects (Couvillon and  
138 Bitterman 1984; Bitterman 1976; Núñez 1966). Bitterman (1976) found that honey bees which were  
139 trained to a 40% sucrose solution show many feeding interruptions when experiencing a downshift to  
140 20% sucrose. By contrast, bees which were fed on 20% throughout the whole experiment filled their  
141 crops immediately. Bees which were shifted from 20% to 40% showed no interruptions at the post-  
142 shift solution either. Apart from explaining these results as negative contrast effects, Bitterman  
143 suggested two alternative hypotheses: sensory saturation (see above) and changes in satiation level.  
144 Individuals may not only store sucrose solutions in their crop, but may also ingest small amounts of  
145 sucrose, leading to an increase of haemolymph-sugar levels. Higher blood-sugar levels negatively affect  
146 sweetness perception in humans (Mayer-Gross and Walker 1946; Melanson et al. 1999), and a similar  
147 effect could cause a post-shift solution to taste less sweet to animals trained on high sucrose  
148 concentrations. However, using an odour training paradigm, Couvillon and Bitterman (1984) found  
149 negative contrast effects in honeybees and could rule out the above alternative causes.

150 In this study, we investigate positive and negative contrast effects using the successive contrasts  
151 paradigm, and define the first relative value curve in an invertebrate; the ant *Lasius niger*. We then  
152 demonstrate that relative value perception arises from non-rational cognitive effects, rather than  
153 rational decision-making, physiological effects, or psychophysical phenomena. Finally, we  
154 demonstrate that information flowing into the nest can influence value perception in outgoing foragers.

## 155 Methods and Results

### 156 Study animals

157 Eight stock colonies of the black garden ant *Lasius niger* were collected on the University of Regensburg  
158 campus. The colonies were kept in 30x30x10cm foraging boxes with a layer of plaster covering the  
159 bottom. Each box contained a circular plaster nest box (14 cm diameter, 2 cm height). The colonies  
160 were queenless with around 1000-2000 workers and small amounts of brood. Queenless colonies still  
161 forage and lay pheromone trails, and are frequently used in foraging experiments (Devigne and Detrain  
162 2002; Dussutour et al. 2004). The colonies were fed with *ad libitum* 0.5M sucrose solution and received  
163 *Drosophila* fruit flies once a week. Water was available *ad libitum*.

164 One sub-colony of 500 individuals was formed from each stock colony, and these eight fixed-size sub-  
165 colonies were used for our experiments. Sub-colonies were maintained identically to the stock colonies,  
166 but did not receive any *Drosophila* fruit flies to prevent brood production, and were starved four days

167 prior to the experiments in order to achieve a uniform and high motivation for foraging (Mailleux,  
168 Detrain, and Deneubourg 2006; Josens and Roces 2000). During starvation, water was available *ad*  
169 *libitum*. Any ants which died or were removed from the sub-colonies were replaced with ants from the  
170 original stock colonies.

## 171 General setup

172 The general setup used for all of our three experiments was identical and consisted of a 20 x 1 cm long  
173 paper-covered runway which was connected to the sub-colony's nest box via a 40 cm long drawbridge  
174 (figure 1A). A 5mm diameter drop of sucrose solution (Sigma-Aldrich) was placed on an acetate feeder  
175 at the end of the runway (60cm from the nest). The molarity of the sucrose droplet depended on the  
176 experiment, treatment and on the ants' number of visit to the food source.

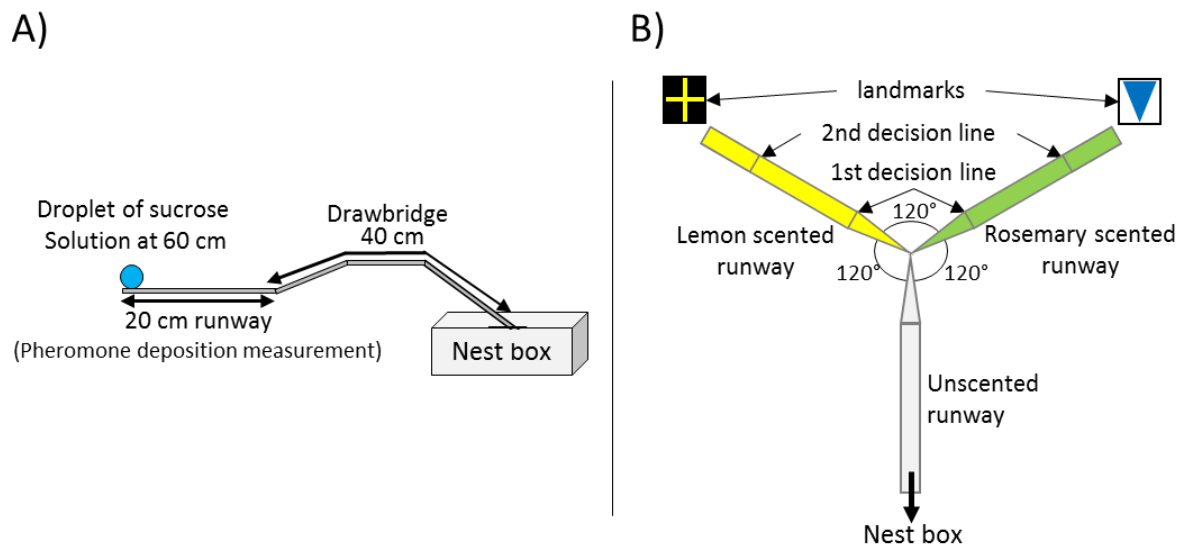

177

178 Fig. 1: **A)** General setup used for all presented experiments. The 20 cm long runway is connected to the nest box  
179 via a 40 cm long drawbridge. The droplet of sucrose solution is placed at the end of the runway (60 cm distance  
180 to the nest). **B)** Y-maze used on the 10<sup>th</sup> visit of experiment 2. All arms were 10 cm long. The arm connected to  
181 the nest box was covered with unscented paper overlays while the other two arms were covered with lemon and  
182 rosemary scented paper overlays (one scent on each side). Visual cues (landmarks) were placed directly behind  
183 the two scented arms. The first decision line was located 2.5cm from the Y-maze centre and marked the initial  
184 decision of an ant while the second decision line was located 7.5cm from the centre and marked the final decision.  
185

186 To begin an experiment, the sub-colony was connected to the runway via the drawbridge. 2-4 ants  
187 were allowed onto the runway, and the first ant to reach the feeder was marked with a dot of acrylic  
188 paint on its gaster. The marked ant was allowed to drink to repletion at the food source, while all other  
189 ants were returned to the nest. As the ant drank at the droplet it was given one of three food  
190 acceptance scores. Full acceptance (1) was scored when the ant remained in contact with the drop  
191 from the moment of contact and did not interrupt drinking within 3 seconds of initial contact. Partial  
192 acceptance (0.5) was scored if feeding was interrupted within 3 seconds after the first contact with the  
193 food source, but the ant still filled its crop within 10 minutes (as can be seen by the distention of the

194 abdominal tergites). Lastly, rejection (0) was scored if the ant refused to feed at the sucrose solution  
195 and either returned to the nest immediately or failed to fill its crop within 10 minutes.

196 When the ant had filled its crop or decided not to feed at the sucrose droplet, it was allowed to return  
197 to the nest. Inside the nest, the ant unloaded its crop to its nestmates and was then allowed back onto  
198 the runway for another visit. The drawbridge was now used to selectively allow only the marked ant  
199 onto the runway.

200 In addition to measuring food acceptance, we also measured pheromone deposition. Individual  
201 pheromone deposition behaviour correlates with the (perceived) quality of a food source (Beckers,  
202 Deneubourg, and Goss 1993; Hangartner 1970; Czaczkes, Grüter, and Ratnieks 2015). Individual ants  
203 can adapt the strength of a pheromone trail by either depositing pheromone or not, or varying the  
204 intensity of a pheromone trail through number of pheromone depositions (Hangartner 1970; Beckers,  
205 Deneubourg, and Goss 1993). Pheromone deposition behaviour in *L. niger* is highly stereotypic. To  
206 deposit pheromone, an ant briefly interrupts running to bend its gaster and press the tip of the gaster  
207 onto the ground (Beckers, Deneubourg, and Goss 1992). This allows the strength of a pheromone trail  
208 to be quantified by counting the number of pheromone depositions over the 20 cm runway leading to  
209 the feeder. Pheromone depositions were measured each time the ant moved from the food source  
210 back to the nest (inward trip), and each time the ant moved from the nest towards the food source  
211 (outward trip). Because *L. niger* foragers almost never lay pheromone when they are not aware of a  
212 food source (Beckers, Deneubourg, and Goss 1992), we did not measure pheromone depositions for  
213 the very first outward trip (visit 1). The presence of trail pheromone on a path depresses further  
214 pheromone deposition (Czaczkes et al. 2013). Thus, each time an ant had passed the 20 cm runway,  
215 the paper overlay covering the runway was replaced by a fresh one every time the ant left the runway  
216 to feed at the feeder or returned to the nest.

217 All experimental runs were recorded with a Panasonic DMC-FZ1000 camera to allow for later video  
218 analysis.

219 After each experimental run the ant was permanently removed.

220 Details of our statistical analysis methods and samples sizes are provided in online supplement S1.

## 221 Experiment 1 – Defining a relative value perception curve

222 The aim of this of experiment was to test whether *Lasius niger* foragers value a given absolute sucrose  
223 solution concentration relative to a reference point or based on its absolute value. We used a range of  
224 12 molarities as reference points in order to describe a value curve. To exclude effects of the

225 researcher's expectations on the data, the data for this experiment were collected blind to treatment  
226 (Holman et al. 2015).

## 227 Experiment 1 - Methods

228 In the first two visits to the apparatus - termed the training visits - the ants' reference point was set by  
229 allowing it to feed from a feeder at the end of the runway. The quality of the sucrose solution was  
230 varied between ants, with each ant receiving the same quality twice successively. 12 different  
231 molarities were used: 0.1, 0.2, 0.3, 0.4, 0.5, 0.6, 0.7, 0.8, 0.9, 1, 1.5 or 2M. *Lasius niger* workers learn  
232 the quality of a feeder within 2 visits (Wendt and Czaczkes 2017). On the third visit (test visit), the food  
233 source was replaced by a 0.5M sucrose solution droplet for all ants. Thus, ants trained to qualities  
234 <0.5M experienced a positive successive contrast, ants trained to >0.5M experienced negative  
235 successive contrast, and the ants trained to 0.5M constituted the control (no contrast). Food  
236 acceptance and pheromone depositions were noted for each visit, as described above.

## 237 Experiment 1 - Results

238 Ants seemed to value sucrose solution droplets relative to a reference point (figure 2, table S1). While  
239 in the training visits acceptance scores increased significantly with increasing molarity of the reference  
240 quality (CLMM: 1<sup>st</sup> visit: estimate= 1.18, z=6.99, p>0.001; 2<sup>nd</sup> visit: estimate= 1.56, z=9.28, p<0.001, fig.  
241 2), in the test (contrast) visit acceptance scores decreased significantly with increasing molarity of the  
242 reference quality (CLMM: estimate=-2.59, z= -13.75, p<0.001, fig. 2). Ants which were trained to very  
243 low molarities (0.1M: p<0.001) showed significantly higher acceptance of 0.5M sucrose than control  
244 ants, while ants trained to high molarities (1.5M: p<0.001, 2M: p<0.001) showed lower acceptance of  
245 0.5M than the control group (see supplement Table S2.1 for all pairwise comparisons).



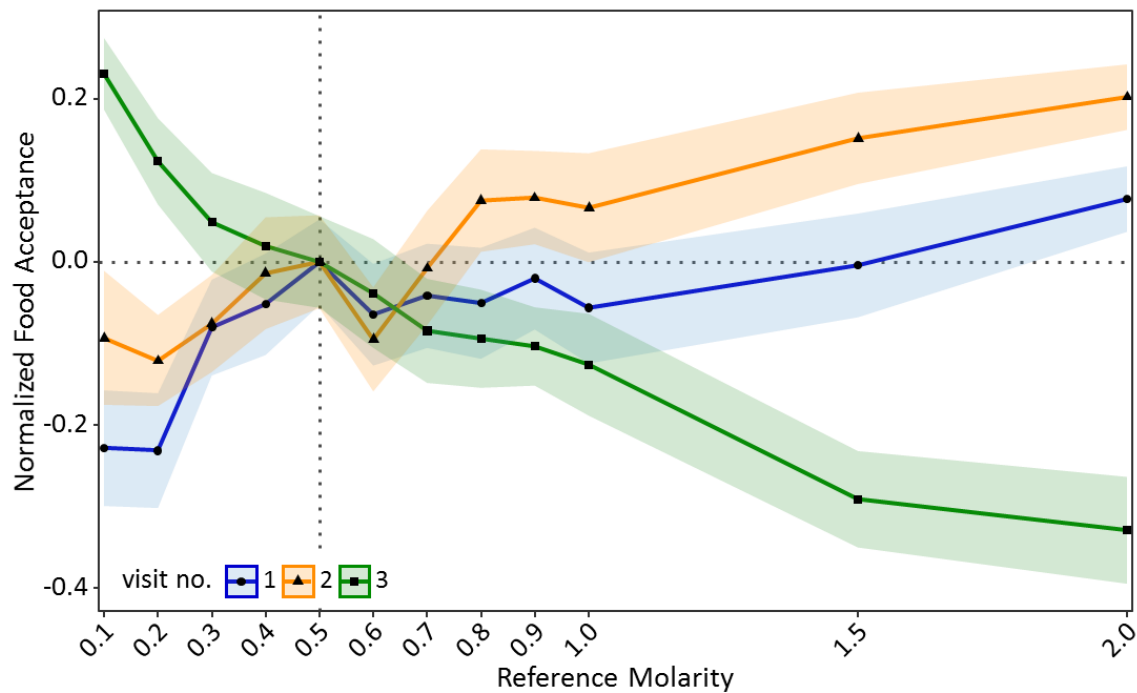

246

247 Fig. 2: Food acceptance shown in experiment 1 for the two training visits (visit 1 & 2) in which ants received one  
248 of 12 molarities and the test visit (3) in which all ants received 0.5M. Shown are the mean food acceptance  
249 (points) and the 95% confidence intervals (coloured ribbons) for each reference molarity and visit. Data was  
250 normalized to show the mean food acceptance of the control group (received 0.5M on each visit) at 0 for all  
251 three visits. For a non-normalized graph of the data see supplement Figure S2.1.

252

253 A similar pattern was found for pheromone deposition behaviour on the way back to the nest (figure  
254 3). In the training visits, number of pheromone depositions increased significantly with increasing  
255 molarity of the reference solution (GLMM: estimate= 0.86,  $z = 13.86$ ,  $p < 0.001$ ). Additionally, ants  
256 performed significantly more pheromone depositions on the second return to the nest compared to  
257 the first return visit (GLMM: estimate= 0.31,  $z = 4.64$ ,  $p < 0.001$ ). By contrast, on the test visit pheromone  
258 depositions decreased significantly with increasing molarity of the reference solution (GLMM:  
259 estimate= -0.82,  $z = -9.75$ ,  $p < 0.001$ , fig. 3). Ants which deposited more pheromone during the training  
260 visits generally deposited more pheromone on the test visit compared to ants which deposited less  
261 pheromone during the training visits (GLMM: estimate= 0.16,  $z = 15.99$ ,  $p < 0.001$ ). Ants which were  
262 trained to very low molarities (0.2M:  $p < 0.01$ ) deposited significantly more pheromone depositions in  
263 the test visit than control ants, while ants trained to high molarities (1M:  $p < 0.001$ , 1.5M:  $p < 0.001$ , 2M:  
264  $p < 0.001$ ) deposited less pheromone depositions than the control group (see supplement Table S2.2  
265 for pairwise comparisons).

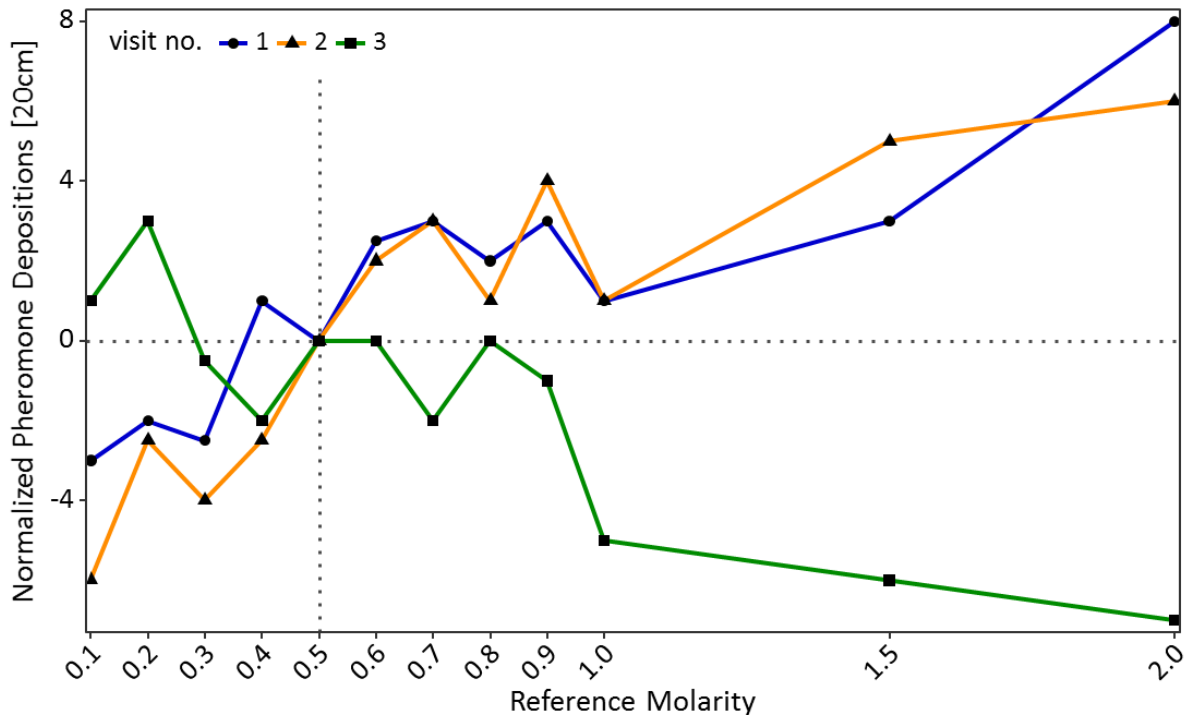

266

267 Fig. 3: Pheromone depositions on the way back to the nest shown in experiment 1 for the two training visits (visit  
268 1 & 2) in which ants received one of 12 molarities and the test visit (3) in which all ants received 0.5M. Shown is  
269 the median number of pheromone depositions (points) measured on a 20 cm track right behind the food source  
270 for each reference molarity and visit. Data was normalized to show the median number of pheromone  
271 depositions of the control group (received 0.5M on each visit) at 0 for all three visits. For a non-normalized graph  
272 of the data with error ribbons see supplement Figure S2.2.  
273

## 274 Experiment 2 – ruling out alternative explanations using scent training

275 The results of experiment 1 are consistent with relative value perception stemming from the  
276 psychological effects of successive contrasts. However, alternative hypotheses could also explain these  
277 results. Four possible alternatives must be excluded: sensory saturation, ingested sucrose changing  
278 haemolymph-sugar levels, psychophysical sensory contrast effects and the fact that ants may expect  
279 pre-shift solutions to return in later visits (see introduction). To rule out the above four alternative  
280 explanations, we carried out experiment 2.

### 281 Experiment 2 - Methods

282 To rule out the alternative non-psychological explanations for the contrast effects we described above,  
283 we needed to change the expectation of the ants while exposing all ants to identical training regimes.  
284 This would provide a reference point for testing relative value perception while keeping sensory  
285 saturation, haemolymph-sugar levels, and psychophysical effects the same until the switch occurred.  
286 To this end, we trained ants over 8 visits to associate a high sucrose molarity (1.5M) with one scent,  
287 and a low molarity (0.25M) with a different scent. Then, in the 9<sup>th</sup> testing phase, we used scents to  
288 trigger an expectation of either high or low molarity, which was then contrasted with a medium (0.5M)

289 unscented solution. Finally, preference for the high-quality associated odour was tested for using a Y-  
290 maze.

291 For a detailed description of the methods used, see online supplement S3.1.

## 292 Experiment 2 - Results

293 During training, ants behaved as expected, showing higher acceptance and pheromone deposition for  
294 1.5M than 0.25M on all but the very first visit to 0.25M (Food acceptance: CLMM: estimate = -1.13, z=  
295 3.38,  $p < 0.001$ ; pheromone depositions outward journey: GLMM: estimate= 1.79, z= 17.10,  $p < 0.001$ ;  
296 pheromone depositions inward journey: GLMM: estimate= -1.20, z= -10.10,  $p < 0.001$ , figures 4A, C &  
297 E). Furthermore, food acceptance and pheromone depositions both on the outward and inward  
298 journeys decreased with increasing experience with the 0.25M feeder and increased with increasing  
299 experience with the 1.5M feeder (Food acceptance: CLMM: estimate = -1.13, z= 3.38,  $p < 0.001$ ;  
300 pheromone depositions outward journey: GLMM: estimate= -0.31, z= -17.07,  $p < 0.001$ ; pheromone  
301 depositions inward journey: GLMM: estimate = -0.21, z= -7.02,  $p < 0.001$ ).

302 On the outward journey of the 9<sup>th</sup> (test) visit, ants walking towards the feeder while exposed to 1.5M  
303 sucrose-associated cues deposited more pheromone (median=15, fig. 4D) compared to ants exposed  
304 to 0.25M-associated cues (median=2, GLMM: estimate= -1.32, z= -13.51,  $p < 0.001$ ). Moreover, in the  
305 learning probe, 87% of ants chose the 1.5M associated arm. This demonstrates that ants formed a  
306 robust expectation of food molarity based on the cues learned during training.

307 Ants exposed to 1.5M-associated cues during the 9<sup>th</sup> visit showed significantly lower food acceptance  
308 towards the unscented 0.5M feeder than ants exposed to 0.25M-associated cues (CLMM: estimate=  
309 1.07, z= 2.15,  $p = 0.03$ , figure 4B, table S1). Although ants exposed to high molarity associated cues on  
310 their outwards journey showed a significantly higher number of pheromone depositions on their  
311 return journey than ants confronted with low molarity scent (GLMM: estimate= -1.36, z= -5.50,  
312  $p < 0.001$ , figure 4E & F), the number of pheromone depositions decreased drastically for both  
313 treatments compared to training visits (median 1.5M = 0, median 0.25M = 0, figure 4E & F, table S1).

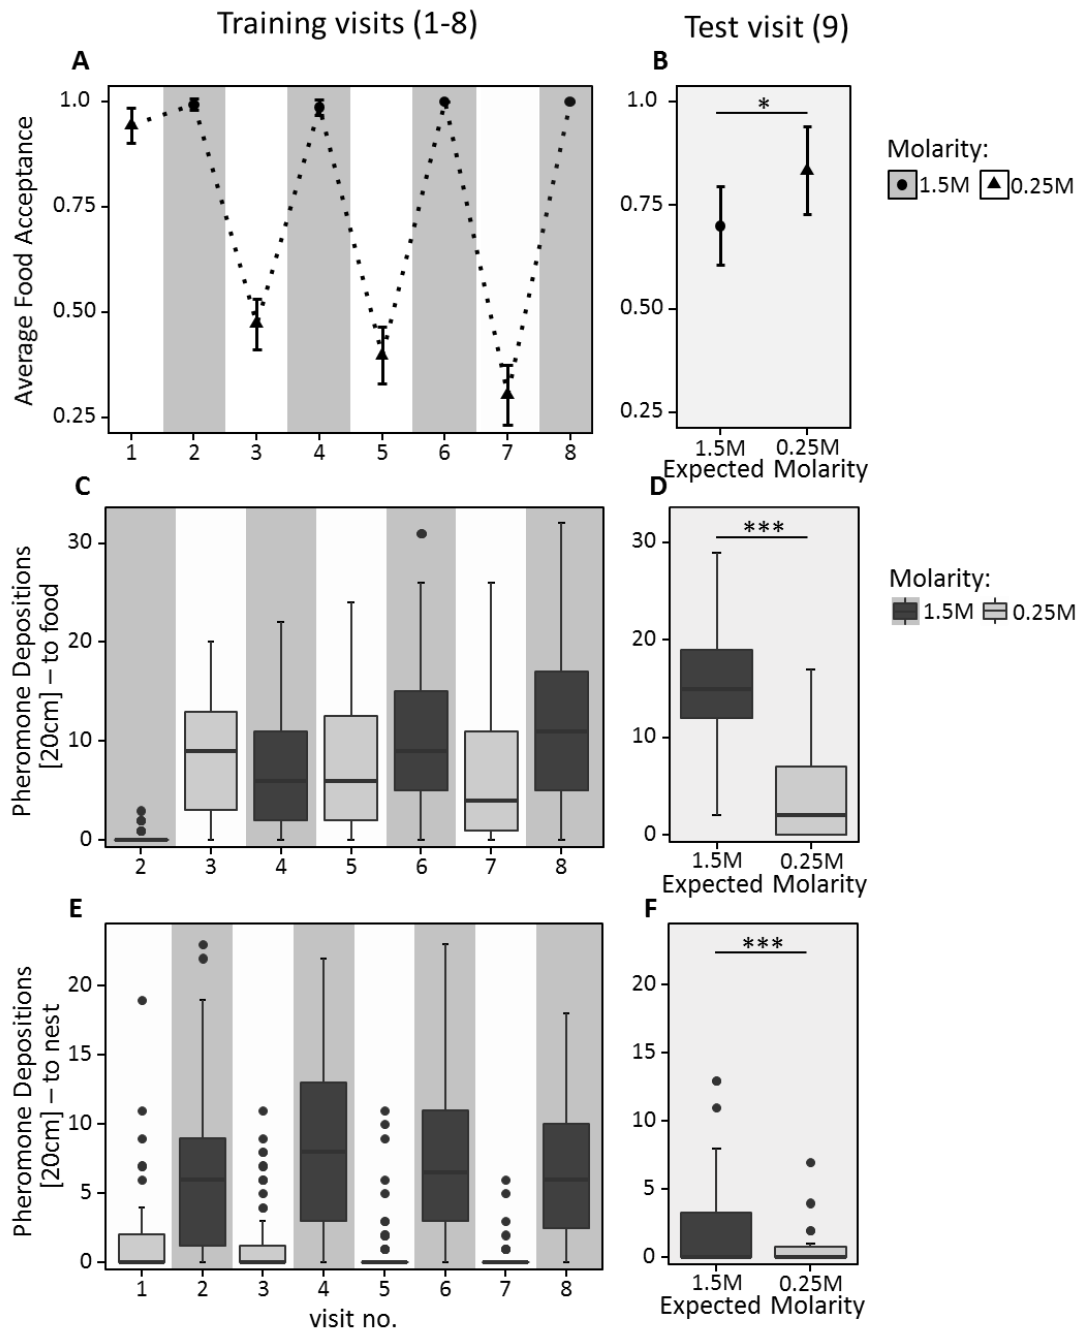

314

315

316 Fig. 4: A) & B) Food acceptance C) & D) Number of pheromone depositions on the way to the food source and E)  
 317 & F) Number of pheromone depositions on the way back to the nest shown in experiment 2 for A), C) & E) the  
 318 eight training visits (visits 1-8) in which ants received 0.25M coupled with one scent and 1.5M coupled with  
 319 another scent in an alternating order, always starting with 0.25M. and B), D) & F) the test visit (visit 9) in which  
 320 ants always received unscented 0.5M sucrose solution, but the runway leading towards the food source was  
 321 impregnated with one of the learned scents, triggering an expectation towards receiving either high or low  
 322 molarities at the end of the runway. A) & B) Shown are the mean food acceptance (points) and the 95%  
 323 confidence intervals (error bars) for each visit; C) - F) Shown are the median number of pheromone depositions  
 324 on a 20 cm track right in front of the food source and the 75%/25% quantiles for each visit.  
 325

## 326 Experiment 3 – expectation setting via trophallaxis: the nest as an 327 information hub

328 Ants receive information about available food sources, such as food odour and palatability, through  
329 food exchanges (trophallaxis) inside the nest (Provecho and Josens 2009; Josens et al. 2016). An ant  
330 beginning a food scouting bout may not have direct information about the quality of the food sources  
331 available in the environment, but nonetheless must make a value judgement on their first visit to a  
332 food source. The aim of this experiment was to ascertain whether information about sucrose  
333 concentrations gained through trophallaxis in the nest affected the perceived value of food sources  
334 found outside the nest.

### 335 Experiment 3 - Methods

336 An ant (forager) was allowed to feed at an unscented sucrose solution droplet of either 0.16, 0.5 or  
337 1.5M at the end of a 60cm long runway. Once the ant had fed and returned to the nest, we observed  
338 the number of contacts with other nestmates which occurred until trophallaxis was initiated. When  
339 trophallaxis began, we noted the time spent in trophallaxis with the first trophallactic partner. When  
340 trophallaxis stopped, the receiving trophallactic partner (receiver) was gently moved from the nest and  
341 placed onto the start of a 20cm long runway, offering unscented 0.5M sucrose solution at the end. As  
342 the receiver fed, we noted its food acceptance.

### 343 Experiment 3 - Results

344 The time spent in trophallaxis with the receiver increased significantly with increasing molarity (GLMM:  
345 estimate= 0.13,  $z= 4.79$ ,  $p<0.001$ ).

346 Acceptance scores of receivers towards 0.5M decreased with increasing molarity of the sucrose  
347 solution received through trophallaxis. The interaction of reference molarity and trophallaxis time  
348 significantly predicted acceptance (CLMM: estimate=-0.06,  $z= -2.34$ ,  $p= 0.02$ , fig. 5). Ants which  
349 received 0.16M inside the nest showed significantly higher acceptance of 0.5M sucrose than ants  
350 which received 1.5M ( $p<0.01$ , see supplement Table S4.1 for pairwise comparisons).

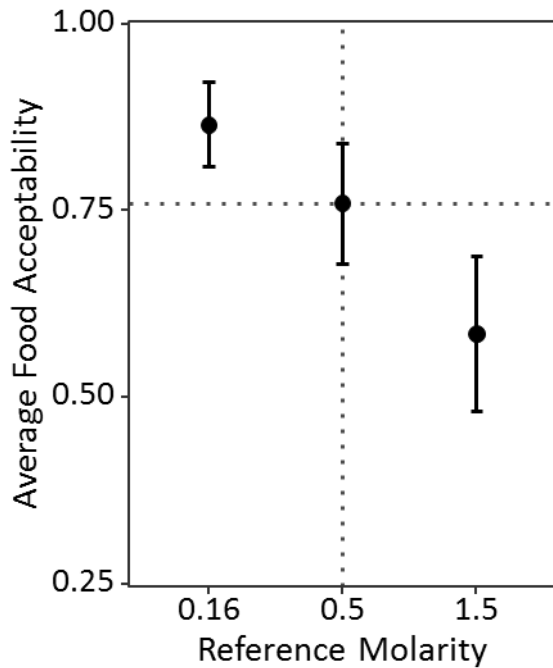

351

352 Fig. 5: Food acceptance shown in experiment 3 for the receivers which received either 0.16, 0.5 or 1.5M through  
353 trophallaxis in the nest and then found 0.5M at the end of the runway. Shown are the mean food acceptance  
354 (points) and the 95% confidence intervals (error bars) for each reference molarity.

## 355 Discussion

356 Kahneman and Tversky's (1979) introduction of Prospect Theory contributed to a major shift in  
357 economic research by suggesting that humans do not perceive value in absolute terms, but relative to  
358 reference points. Here, we demonstrate parallel findings in an insect, providing for the first time to our  
359 knowledge a detailed description of relative value perception in an invertebrate. Positive contrast  
360 effects were shown by ants which were trained to low molarities (figures 2 & 3). These ants showed  
361 higher acceptance scores and deposited more pheromone after being shifted to medium quality than  
362 unshifted ants which received medium quality food throughout the whole experiment. Conversely,  
363 ants trained to high molarities showed lower acceptance after being shifted to medium quality  
364 compared to the unshifted control, showing negative contrast effects.

365 Another prediction of Prospect Theory, that gains are underemphasized and losses are  
366 overemphasized (Tversky and Kahneman 1992), is not supported by the data of our main experiment.  
367 Indeed, gains seem to be overvalued while losses are undervalued. This may be due to the  
368 psychophysics of our study system: a basic tenant of psychophysics is that the Just Noticeable  
369 Difference (JNDs) between two stimuli is a function of the relative difference between the stimuli  
370 (Fechner 1860; Stevens 1957; Zwislocki 2009). Thus, ants shifted from 0.1M to medium (0.5M) quality  
371 experience a 5-fold increase in molarity, while those down-shifted from 0.9M to 0.5M experience less  
372 than a two-fold decrease, although the absolute change was of the same magnitude. This would

373 predict larger shift-changes, in terms of absolute molarity change, for gains than for losses. Indeed, the  
374 fact that this is also not seen may imply that losses are indeed – relatively speaking – looming larger  
375 than gains for the ants. Finally, it must be kept in mind that acceptance scores are unlikely to be linear,  
376 and that pheromone deposition behaviour shows large variation (Beckers, Deneubourg, and Goss  
377 1992), making it difficult to use either of these factors to test for over- and undervaluation of gains and  
378 losses.

379 While the results of experiment 1 can be explained using alternative, non-psychological mechanisms  
380 (sensory saturation and changes in satiation) or rational behaviour based on future expectations, the  
381 results of experiment 2 cannot. Ants which were expecting high molarities after scent training showed  
382 lower acceptance scores when confronted with unscented medium quality food than ants which  
383 expected to find low quality food (figure 4B). This is in spite of all ants undergoing identical training  
384 experiences. The only difference between the groups was the odour of the runway on the 9<sup>th</sup> (test)  
385 visit. It is thus unlikely that sensory saturation, increased haemolymph-sugar levels, simple  
386 psychophysical effects or expecting pre-shift solutions to return can fully explain the behaviour of the  
387 ants in our experiments.

388 Contrast effects were stronger in experiment 1 than in experiment 2. Possible explanations for this  
389 pattern are given in supplementary note 1. The fact that we nonetheless see both positive and negative  
390 contrasts suggests that such contrast effects are very pronounced. The reduced pheromone deposition  
391 seen in the final return in experiment 2 may be due to the change in environment (scented runways  
392 to unscented runways) causing a disruption in recruitment behaviour, perhaps due to generalization  
393 decrement (E. D. Capaldi 1978; Kimble 1961) or neophobia (Barnett 1958; Johnson 2000, 2000;  
394 Mitchell 1976; Pliner and Loewen 1997).

395 Ants which received information about the quality of a food source through trophallactic interactions  
396 inside the nest are able to use this information when evaluating new food sources outside the nest.  
397 Ants which received low quality (0.16M) food from a returning forager were more likely to accept  
398 medium (0.5M) food when foraging themselves than ants which had received good (1.5M) food via  
399 trophallaxis (fig. 5). Apart from ants valuing the medium quality food source based only on the quality  
400 they received from the returning forager, there is another possible explanation which may lead to the  
401 same pattern of food acceptance as shown in this experiment (fig. 5). Ants which expected to find a  
402 high quality food source outside the nest may not have accepted a medium quality food source in  
403 order to search for the high quality food source which is supposed to be available outside the nest,  
404 leading to low food acceptance scores when the reference point was high (Wendt and Czaczkes 2017).

405 Our results suggest that information about sucrose concentrations gained through trophallactic  
406 interactions inside the nest can affect the way a newly discovered food source is valued outside the  
407 nest. Trophallaxis is a rich source of information: it has been shown to contain chemical cues, growth  
408 proteins, and hormones (LeBoeuf et al. 2016). Transfer of scented food (Provecho and Josens 2009;  
409 Josens et al. 2016) and aphid-associated information (Hayashi et al. 2017) through trophallactic  
410 contacts inside the nest, as well as information about available food qualities gained directly or through  
411 pheromone trails (Beckers, Lachaud, and Fresneau 1994; Czaczkes and Beckwith 2018; Roces and  
412 Núñez 1993; Roces 1993; Wendt and Czaczkes 2017) have been shown to shape ant behaviour outside  
413 the nest. By taking into account information gained inside the nest, recruited workers will be able to  
414 evaluate newly discovered food sources in relation to other food sources available in the environment.  
415 They will also be able to make better informed decisions on whether it is worth exploiting a new food  
416 source or ignore it. Such a pattern would lead to individual ants being more likely to forego food  
417 sources which are of lower quality than the average available food sources and thus allows colonies to  
418 only exploit above-average food sources. Ants can also use this information to choose between various  
419 information use strategies, such as whether to continue exploiting known food sources or be recruited  
420 to follow pheromone trails leading to other food sources (Czaczkes and Beckwith 2018). Ultimately,  
421 we see the nest serving as an information hub, in which information about currently available food  
422 sources can be collected, synthesised, and fed back to outgoing foragers. Relative value perception can  
423 therefore be expected to have strong effects not only on the individual behaviour of animals, but also  
424 on the collective behaviour of insect colonies, potentially allowing colonies to ignore usually acceptable  
425 options in favour of better ones

426 A broad range of behaviours relevant to behavioural economics have now been described in  
427 invertebrates. These include overvaluing rewards in which more effort was invested (Czaczkes et al.  
428 2018), self-control (Cheng et al. 2002; Wendt and Czaczkes 2017), and state dependent learning  
429 (Pompilio, Kacelnik, and Behmer 2006). Many other parallels to human behaviour and cognition have  
430 also been described in insects, such as abstract association learning (Czaczkes et al. 2014; Giurfa,  
431 Eichmann, and Menzel 1996; Hateren, Srinivasan, and Wait 1990), concept learning (Giurfa et al. 2001),  
432 and reward changes affecting voluntary task switching (Czaczkes et al. 2018). Applying concepts from  
433 behavioural economics to the study of animal behaviour is likely to yield many further insights.  
434 Moreover, the benefits of an interdisciplinary approach are likely to flow both ways. We suggest that  
435 invertebrates make attractive models for a broader understanding of behavioural economics in  
436 humans. Using animal models allows researchers to avoid pitfalls associated with studies on humans,  
437 such as cultural and educational differences (Carter and Irons 1991; Guiso, Sapienza, and Zingales  
438 2006) second-guessing of experimenters, and non-relevant reward sizes (Levitt and List 2007) as well  
439 as relaxing ethical concerns.



440 Due to its complexity, building models which can accurately predict human behaviour is a challenge.  
441 This is compounded by the fact that data on humans obtained in laboratory experiments  
442 overwhelmingly stem from game-like designs that are highly artificial and where the economic  
443 incentives that can be provided to experimental subjects are severely limited by the research budget  
444 of the experimenter (Kahneman and Tversky 1979; Levitt and List 2007). At the same time, there has  
445 been much progress in field studies on humans to clearly measure causal relationships (Harrison and  
446 List 2004). However, the usefulness of these new techniques (such as field experiments) is clearly  
447 constrained by the range of questions and settings to which they can be meaningfully applied. Hence,  
448 while behavioural studies on invertebrates also have their limitations (for example, in that inducing  
449 expectations is more of a challenge), they can be easily designed to be ecologically meaningful, and  
450 offer rewards which are in line with the real-life budgets under which the animals operate. Therefore,  
451 we propose that economic models to predict invertebrate decision making may be a complementary  
452 step on the way to predict human behaviour.

453 While there is a well-developed tradition of integrating economics and biology (Aw et al. 2009; Aw,  
454 Vasconcelos, and Kacelnik 2011; Cheng et al. 2002; Czaczkas et al. 2018; Evans and Westergaard 2006;  
455 Lydall, Gilmour, and Dwyer 2010; Wendt and Czaczkas 2017), we feel a critical mass of evidence is now  
456 available to consider comparative behavioural economics as a relevant discipline for both biologists  
457 and economists.

## 458 Acknowledgements

459 We thank Flavio Rocas for helpful comments on this work and Florian Hartig for advice concerning  
460 statistical analysis of our data.

## 461 References

- 462 Annicchiarico, Ivan, Amanda C. Glueck, Lucas Cuenya, Katsuyoshi Kawasaki, Shannon E. Conrad, and  
463 Mauricio R. Papini. 2016. "Complex Effects of Reward Upshift on Consummatory Behavior." *Behavioural Processes* 129 (August): 54–67. <https://doi.org/10.1016/j.beproc.2016.06.006>.
- 464 Aw, J. M., R. I. Holbrook, T. Burt de Perera, and A. Kacelnik. 2009. "State-Dependent Valuation Learning  
465 in Fish: Banded Tetras Prefer Stimuli Associated with Greater Past Deprivation." *Behavioural  
466 Processes, Proceedings of the meeting of the Society for the Quantitative Analyses of Behavior  
467 (SQAB 2008)*, which took place in Chicago IL, May 22-24 of 2008, 81 (2): 333–36.  
468 <https://doi.org/10.1016/j.beproc.2008.09.002>.
- 469 Aw, J. M., Marco Vasconcelos, and Alex Kacelnik. 2011. "How Costs Affect Preferences: Experiments  
470 on State Dependence, Hedonic State and within-Trial Contrast in Starlings." *Animal Behaviour*  
471 81 (6): 1117–28. <https://doi.org/10.1016/j.anbehav.2011.02.015>.
- 472 Barnett, S. A. 1958. "Experiments on 'Neophobia' in Wild and Laboratory Rats." *British Journal of  
473 Psychology* 49 (3): 195–201. <https://doi.org/10.1111/j.2044-8295.1958.tb00657.x>.
- 474 Beckers, R., J. L. Deneubourg, and S. Goss. 1992. "Trail Laying Behaviour during Food Recruitment in  
475 the Ant *Lasius Niger* (L.)." *Insectes Sociaux* 39: 59–72.
- 476

- 477 ———. 1993. "Modulation of Trail Laying in the Ant *Lasius Niger* (Hymenoptera: Formicidae) and Its  
478 Role in the Collective Selection of a Food Source." *Journal of Insect Behavior* 6 (6): 751–59.  
479 <https://doi.org/10.1007/BF01201674>.
- 480 Beckers, R., J. P. Lachaud, and D. Fresneau. 1994. "The Influence of Olfactory Conditioning on Food  
481 Preference in the Ant *Lasius Niger* (L.)." *Ethology Ecology & Evolution* 6 (2): 159–67.  
482 <https://doi.org/10.1080/08927014.1994.9522991>.
- 483 Bentosela, Mariana, Adriana Jakovcevic, Angel M. Elgier, Alba E. Mustaca, and Mauricio R. Papini. 2009.  
484 "Incentive Contrast in Domestic Dogs (*Canis Familiaris*)." *Journal of Comparative Psychology*  
485 123 (2): 125–30. <https://doi.org/10.1037/a0013340>.
- 486 Bitterman, M.E. 1976. "Incentive Contrast in Honey Bees." *Science* 192 (4237): 380–82.
- 487 Black, R. W. 1968. "Shifts in Magnitude of Reward and Contrast Effects in Instrumental and Selective  
488 Learning: A Reinterpretation." *Psychological Review* 75 (2): 114–26.  
489 <https://doi.org/10.1037/h0025563>.
- 490 Bower, G. H. 1961. "A Contrast Effect in Differential Conditioning." *Journal of Experimental Psychology*  
491 62 (2): 196–99. <http://dx.doi.org/10.1037/h0048109>.
- 492 Boyce, Christopher J., Gordon D. A. Brown, and Simon C. Moore. 2010. "Money and Happiness: Rank  
493 of Income, Not Income, Affects Life Satisfaction." *Psychological Science* 21 (4): 471–75.  
494 <https://doi.org/10.1177/0956797610362671>.
- 495 Brosnan, Sarah F., and Frans B. M. de Waal. 2003. "Monkeys Reject Unequal Pay." *Nature* 425 (6955):  
496 297. <https://doi.org/10.1038/nature01963>.
- 497 Campbell, Patrick E., Charles M. Crumbaugh, Stephen B. Knouse, and M. Emily Snodgrass. 1970. "A  
498 Test of the 'Ceiling Effect': Hypothesis of Positive Contrast." *Psychonomic Science* 20 (1): 17–  
499 18. <https://doi.org/10.3758/BF03335577>.
- 500 Capaldi, E. J., and D. Lynch. 1967. "Repeated Shifts in Reward Magnitude: Evidence in Favor of an  
501 Associational and Absolute (Noncontextual) Interpretation." *Journal of Experimental*  
502 *Psychology* 75 (2): 226–35. <https://doi.org/10.1037/h0024986>.
- 503 Capaldi, Elizabeth D. 1978. "Effects of Changing Alley Color on the Successive Negative Contrast Effect."  
504 *Bulletin of the Psychonomic Society* 12 (1): 69–70. <https://doi.org/10.3758/BF03329628>.
- 505 Carter, John R., and Michael D. Irons. 1991. "Are Economists Different, and If So, Why?" *Journal of*  
506 *Economic Perspectives* 5 (2): 171–77. <https://doi.org/10.1257/jep.5.2.171>.
- 507 Cheng, Ken, Jennifer Peña, Melanie A. Porter, and Julia D. Irwin. 2002. "Self-Control in Honeybees."  
508 *Psychonomic Bulletin & Review* 9 (2): 259–63. <https://doi.org/10.3758/BF03196280>.
- 509 Couvillon, P.A., and M.E. Bitterman. 1984. "The Overlearning-Extinction Effect and Successive  
510 Contrasts in Honeybees." *Journal of Comparative Psychology* 98 (1): 100–109.
- 511 Crespi, Leo P. 1942. "Quantitative Variation of Incentive and Performance in the White Rat." *The*  
512 *American Journal of Psychology* 55 (4): 467–517. <https://doi.org/10.2307/1417120>.
- 513 Czaczkes, Tomer J., and John J. Beckwith. 2018. "Information Synergy: Adding Unambiguous Quality  
514 Information Rescues Social Information Use in Ants." *BioRxiv*, February, 219980.  
515 <https://doi.org/10.1101/219980>.
- 516 Czaczkes, Tomer J., Birgit Brandstetter, Isabella di Stefano, and Jürgen Heinze. 2018. "Greater Effort  
517 Increases Perceived Value in an Invertebrate." *Journal of Comparative Psychology*, March.
- 518 Czaczkes, Tomer J., Christoph Grüter, Laura Ellis, Elizabeth Wood, and Francis L. W. Ratnieks. 2013.  
519 "Ant Foraging on Complex Trails: Route Learning and the Role of Trail Pheromones in *Lasius*  
520 *Niger*." *Journal of Experimental Biology* 216 (2): 188–97. <https://doi.org/10.1242/jeb.076570>.
- 521 Czaczkes, Tomer J., Christoph Grüter, and Francis L. W. Ratnieks. 2015. "Trail Pheromones: An  
522 Integrative View of Their Role in Social Insect Colony Organization." *Annual Review of*  
523 *Entomology* 60 (1): 581–99. <https://doi.org/10.1146/annurev-ento-010814-020627>.
- 524 Czaczkes, Tomer J., Alexandra Koch, K. Fröber, and G. Dreisbach. 2018. "Voluntary Switching in an  
525 Invertebrate: The Effect of Cue and Reward Change." *Journal of Experimental Psychology:*  
526 *Animal Learning and Cognition*.

- 527 Czaczkes, Tomer J., Linda Schlosser, Jürgen Heinze, and Volker Witte. 2014. "Ants Use Directionless  
528 Odour Cues to Recall Odour-Associated Locations." *Behavioral Ecology and Sociobiology* 68  
529 (6): 981–88. <https://doi.org/10.1007/s00265-014-1710-2>.
- 530 Devigne, C., and C. Detrain. 2002. "Collective Exploration and Area Marking in the Ant <Emphasis  
531 Type="Italic">Lasius Niger</Emphasis>." *Insectes Sociaux* 49 (4): 357–62.  
532 <https://doi.org/10.1007/PL00012659>.
- 533 Dunham, P. J. 1968. "Contrasted Conditions of Reinforcement: A Selective Critique." *Psychological  
534 Bulletin* 69 (5): 295–315. <https://doi.org/10.1037/h0025690>.
- 535 Dussutour, Audrey, Vincent Fourcassié, Dirk Helbing, and Jean-Louis Deneubourg. 2004. "Optimal  
536 Traffic Organization in Ants under Crowded Conditions." *Nature* 428 (6978): 70–73.  
537 <https://doi.org/10.1038/nature02345>.
- 538 Evans, T.A., and G.C. Westergaard. 2006. "Self Control and Tool Use in Tufted Capuchin Monkeys."  
539 *Journal of Comparative Psychology* 120 (2): 163–66. [https://doi.org/10.1037/0735-  
540 7036.120.2.163](https://doi.org/10.1037/0735-7036.120.2.163).
- 541 Fechner, G. T. 1860. *Elemente Der Psychophysik [Elements of Psychophysics]*. Vol. Band 2. Leipzig:  
542 Breitkopf und Härtel.
- 543 Flaherty, Charles F. 1982. "Incentive Contrast: A Review of Behavioral Changes Following Shifts in  
544 Reward." *Animal Learning & Behavior* 10 (4): 409–40. <https://doi.org/10.3758/BF03212282>.
- 545 ———. 1999. *Incentive Relativity*. Problems in the Behavioural Sciences 15. Cambridge University Press.
- 546 Flaherty, Charles F., Howard C. Becker, and Larissa Pohorecky. 1985. "Correlation of Corticosterone  
547 Elevation and Negative Contrast Varies as a Function of Postshift Day." *Animal Learning &  
548 Behavior* 13 (3): 309–14. <https://doi.org/10.3758/BF03200025>.
- 549 Giurfa, Martin, Birgit Eichmann, and Randolf Menzel. 1996. "Symmetry Perception in an Insect."  
550 *Nature* 382 (6590): 458–61. <https://doi.org/10.1038/382458a0>.
- 551 Giurfa, Martin, Shaowu Zhang, Arnim Jenett, Randolf Menzel, and Mandyam V. Srinivasan. 2001. "The  
552 Concepts of 'Sameness' and 'Difference' in an Insect." *Nature* 410 (6831): 930–33.  
553 <https://doi.org/10.1038/35073582>.
- 554 Guiso, Luigi, Paola Sapienza, and Luigi Zingales. 2006. "Does Culture Affect Economic Outcomes?"  
555 *Journal of Economic Perspectives* 20 (2): 23–48. <https://doi.org/10.1257/jep.20.2.23>.
- 556 Hangartner, W. 1970. "Control of Pheromone Quantity in Odor Trails of the Ant *Acanthomyops*  
557 *Interjectus*." *Experientia* 26 (6): 664–65. <https://doi.org/10.1007/BF01898753>.
- 558 Harrison, Glenn W., and John A. List. 2004. "Field Experiments." *Journal of Economic Literature* 42 (4):  
559 1009–55. <https://doi.org/10.1257/0022051043004577>.
- 560 Hateren, J. H. van, M. V. Srinivasan, and P. B. Wait. 1990. "Pattern Recognition in Bees: Orientation  
561 Discrimination." *Journal of Comparative Physiology A* 167 (5): 649–54.  
562 <https://doi.org/10.1007/BF00192658>.
- 563 Hayashi, Masayuki, Masaru K. Hojo, Masashi Nomura, and Kazuki Tsuji. 2017. "Social Transmission of  
564 Information about a Mutualist via Trophallaxis in Ant Colonies." *Proc. R. Soc. B* 284 (1861):  
565 20171367. <https://doi.org/10.1098/rspb.2017.1367>.
- 566 Helson, H. 1964. *Adaptation-Level Theory: An Experimental and Systematic Approach to Behavior*. New  
567 York: Harper and Row.
- 568 Holman, Luke, Megan L. Head, Robert Lanfear, and Michael D. Jennions. 2015. "Evidence of  
569 Experimental Bias in the Life Sciences: Why We Need Blind Data Recording." *PLOS Biology*.  
570 <https://doi.org/10.1371/journal.pbio.1002190>.
- 571 Johnson, Elizabeth. 2000. "Food-Neophobia in Semi-Free Ranging Rhesus Macaques: Effects of Food  
572 Limitation and Food Source." *American Journal of Primatology* 50 (1): 25–35.  
573 [https://doi.org/10.1002/\(SICI\)1098-2345\(200001\)50:1<25::AID-AJP3>3.0.CO;2-D](https://doi.org/10.1002/(SICI)1098-2345(200001)50:1<25::AID-AJP3>3.0.CO;2-D).
- 574 Josens, Roxana, Analia Mattiacci, Jimena Lois-Milevicich, and Alina Giacometti. 2016. "Food  
575 Information Acquired Socially Overrides Individual Food Assessment in Ants." *Behavioral  
576 Ecology and Sociobiology* 70 (12): 2127–38. <https://doi.org/10.1007/s00265-016-2216-x>.

- 577 Josens, Roxana, and Flavio Roces. 2000. "Foraging in the Ant *Camponotus Mus*: Nectar-Intake Rate and  
578 Crop Filling Depend on Colony Starvation." *Journal of Insect Physiology* 46 (7): 1103–10.  
579 [https://doi.org/10.1016/S0022-1910\(99\)00220-6](https://doi.org/10.1016/S0022-1910(99)00220-6).
- 580 Kahneman, Daniel, and Amos Tversky. 1979. "Prospect Theory: An Analysis of Decision under Risk."  
581 *Econometrica* 47 (2): 263–91.
- 582 Kimble, G. A. 1961. *Hilgard and Marquis' "Conditioning and Learning."* Vol. 2nd edition. East Norwalk,  
583 CT, US: Appleton-Century-Crofts.
- 584 LeBoeuf, Adria C, Patrice Waridel, Colin S Brent, Andre N Gonçalves, Laure Menin, Daniel Ortiz, Oksana  
585 Riba-Grognuz, et al. 2016. "Oral Transfer of Chemical Cues, Growth Proteins and Hormones in  
586 Social Insects." *ELife* 5. <https://doi.org/10.7554/eLife.20375>.
- 587 Levitt, Steven D., and John A. List. 2007. "What Do Laboratory Experiments Measuring Social  
588 Preferences Reveal About the Real World?" *Journal of Economic Perspectives* 21 (2): 153–74.  
589 <https://doi.org/10.1257/jep.21.2.153>.
- 590 Lydall, Emma S., Gary Gilmour, and Dominic M. Dwyer. 2010. "Rats Place Greater Value on Rewards  
591 Produced by High Effort: An Animal Analogue of the 'Effort Justification' Effect." *Journal of*  
592 *Experimental Social Psychology* 46 (6): 1134–37. <https://doi.org/10.1016/j.jesp.2010.05.011>.
- 593 Mailleux, A.-C., C. Detrain, and J. L. Deneubourg. 2006. "Starvation Drives a Threshold Triggering  
594 Communication." *The Journal of Experimental Biology* 209: 4224–29.  
595 <https://doi.org/10.1242/jeb.02461>.
- 596 Mankiw, N. G. 2011. *Principles of Economics*. South-Western.
- 597 Mayer-Gross, W., and J. W. Walker. 1946. "Taste and Selection of Food in Hypoglycaemia." *British*  
598 *Journal of Experimental Pathology* 27 (5): 297–305.
- 599 McBride, R. L. 1982. "Range Bias in Sensory Evaluation." *International Journal of Food Science &*  
600 *Technology* 17 (3): 405–10. <https://doi.org/10.1111/j.1365-2621.1982.tb00195.x>.
- 601 McNamara, John M., Tim W. Fawcett, and Alasdair I. Houston. 2013. "An Adaptive Response to  
602 Uncertainty Generates Positive and Negative Contrast Effects." *Science* 340 (6136): 1084–86.  
603 <https://doi.org/10.1126/science.1230599>.
- 604 Melanson, Kathleen J., Margriet S. Westerterp-Plantenga, L. Arthur Campfield, and Wim H. M. Saris.  
605 1999. "Blood Glucose and Meal Patterns in Time-Blinded Males, after Aspartame,  
606 Carbohydrate, and Fat Consumption, in Relation to Sweetness Perception." *British Journal of*  
607 *Nutrition* 82 (6): 437–46. <https://doi.org/10.1017/S0007114599001695>.
- 608 Mitchell, D. 1976. "Experiments on Neophobia in Wild and Laboratory Rats: A Reevaluation." *Journal*  
609 *of Comparative and Physiological Psychology* 90 (2): 190–97.  
610 <http://dx.doi.org/10.1037/h0077196>.
- 611 Mustaca, Alba E., Mariana Bentosela, and Mauricio R. Papini. 2000. "Consummatory Successive  
612 Negative Contrast in Mice." *Learning and Motivation* 31 (3): 272–82.  
613 <https://doi.org/10.1006/lmot.2000.1055>.
- 614 Neumann, J. von, and O. Morgenstern. 1944. *Theory of Games and Economic Behavior*. Princeton, NJ:  
615 Princeton University Press.
- 616 Núñez, Josué A. 1966. "Quantitative Beziehungen zwischen den Eigenschaften von Futterquellen und  
617 dem Verhalten von Sammelbienen." *Zeitschrift für vergleichende Physiologie* 53 (2): 142–64.  
618 <https://doi.org/10.1007/BF00343733>.
- 619 Papini, Mauricio R., H. Wayne Ludvigson, David Huneycutt, and Robert L. Boughner. 2001. "Apparent  
620 Incentive Contrast Effects in Autoshaping with Rats." *Learning and Motivation* 32 (4): 434–56.  
621 <https://doi.org/10.1006/lmot.2001.1088>.
- 622 Parducci, Allen. 1984. "Value Judgments: Toward a Relational Theory of Happiness." In *Attitudinal*  
623 *Judgment*, 3–21. Springer Series in Social Psychology. Springer, New York, NY.  
624 [https://doi.org/10.1007/978-1-4613-8251-5\\_1](https://doi.org/10.1007/978-1-4613-8251-5_1).
- 625 Pellegrini, Santiago, and Alba Mustaca. 2000. "Consummatory Successive Negative Contrast with Solid  
626 Food." *Learning and Motivation* 31 (2): 200–209. <https://doi.org/10.1006/lmot.2000.1052>.
- 627 Pliner, PATRICIA, and E. RUTH Loewen. 1997. "Temperament and Food Neophobia in Children and  
628 Their Mothers." *Appetite* 28 (3): 239–54. <https://doi.org/10.1006/appe.1996.0078>.

- 629 Pompilio, Lorena, Alex Kacelnik, and Spencer T. Behmer. 2006. "State-Dependent Learned Valuation  
630 Drives Choice in an Invertebrate." *Science* 311 (5767): 1613–15.  
631 <https://doi.org/10.1126/science.1123924>.
- 632 Premack, D., and W. A. Hillix. 1962. "Evidence for Shift Effects in the Consummatory Response." *Journal*  
633 *of Experimental Psychology* 63 (3): 284–88. <https://doi.org/10.1037/h0039368>.
- 634 Provecho, Yael, and Roxana Josens. 2009. "Olfactory Memory Established during Trophallaxis Affects  
635 Food Search Behaviour in Ants." *Journal of Experimental Biology* 212 (20): 3221–27.  
636 <https://doi.org/10.1242/jeb.033506>.
- 637 Risky, Dwight R., Allen Parducci, and Gary K. Beauchamp. 1979. "Effects of Context in Judgments of  
638 Sweetness and Pleasantness." *Perception & Psychophysics* 26 (3): 171–76.  
639 <https://doi.org/10.3758/BF03199865>.
- 640 Roces, Flavio. 1993. "Both Evaluation of Resource Quality and Speed of Recruited Leaf-Cutting Ants  
641 (Acromyrmex Lundi) Depend on Their Motivational State." *Behavioral Ecology and*  
642 *Sociobiology* 33 (3): 183–89. <https://doi.org/10.1007/BF00216599>.
- 643 Roces, Flavio, and J. A. Núñez. 1993. "Information about Food Quality Influences Load-Size Selection  
644 in Recruited Leaf-Cutting Ants." *Animal Behaviour* 45 (1): 135–43.  
645 <https://doi.org/10.1006/anbe.1993.1012>.
- 646 Stevens, S.S. 1957. "On the Psychophysical Law." *The Psychological Review* 64 (3): 153–81.
- 647 Tinklepaugh, L. O. 1928. "An Experimental Study of Representative Factors in Monkeys." *Journal of*  
648 *Comparative Psychology* 8 (3): 197–236. <https://doi.org/10.1037/h0075798>.
- 649 Tversky, Amos, and Daniel Kahneman. 1974. "Judgment under Uncertainty: Heuristics and Biases."  
650 *Science* 185 (4157): 1124–31. [https://doi.org/DOI: 10.1126/science.185.4157.1124](https://doi.org/DOI:10.1126/science.185.4157.1124).
- 651 ———. 1981. "The Framing of Decisions and the Psychology of Choice." *Science* 211 (4481): 453–58.  
652 <https://doi.org/10.1126/science.7455683>.
- 653 ———. 1992. "Advances in Prospect Theory: Cumulative Representation of Uncertainty." *Journal of*  
654 *Risk and Uncertainty* 5 (4): 297–323. <https://doi.org/10.1007/BF00122574>.
- 655 Ungemach, Christoph, Neil Stewart, and Stian Reimers. 2011. "How Incidental Values From the  
656 Environment Affect Decisions About Money, Risk, and Delay." *Psychological Science* 22 (2):  
657 253–60. <https://doi.org/10.1177/0956797610396225>.
- 658 Vlaev, Ivo, Nick Chater, Neil Stewart, and Gordon D. A. Brown. 2011. "Does the Brain Calculate Value?"  
659 *Trends in Cognitive Sciences* 15 (11): 546–54. <https://doi.org/10.1016/j.tics.2011.09.008>.
- 660 Vogel, J. R., P. J. Mikulka, and N. E. Spear. 1968. "Effects of Shifts in Sucrose and Saccharine  
661 Concentrations on Licking Behavior in the Rat." *Journal of Comparative and Physiological*  
662 *Psychology* 66 (3): 661–66. <https://doi.org/10.1037/h0026556>.
- 663 Weinstein, Lawrence. 1970a. "Negative Incentive Contrast with Sucrose." *Psychonomic Science* 19 (1):  
664 13–14. <https://doi.org/10.3758/BF03335483>.
- 665 ———. 1970b. "Negative Incentive Contrast Effects with Saccharin vs Sucrose and Partial  
666 Reinforcement." *Psychonomic Science* 21 (5): 276–78. <https://doi.org/10.3758/BF03330713>.
- 667 Wendt, Stephanie, and Tomer J. Czaczkes. 2017. "Individual Ant Workers Show Self-Control." *Biology*  
668 *Letters* 13 (10): 20170450. <https://doi.org/10.1098/rsbl.2017.0450>.
- 669 Zwislocki, Jozef J. 2009. *Sensory Neuroscience: Four Laws of Psychophysics*. Springer US.  
670
